# Supplementary material for: Regulable switching from p- to n-type behavior of ordered nanoporous Pt-SnO2 thin films with enhanced room temperature toluene sensing performance
Source: Royal Society of Chemistry journal article supplement (doi:10.1039/c5ra24736e), 2016-01-01
Supplement: c5ra24736e1.pdf [file c5ra24736e1.pdf]

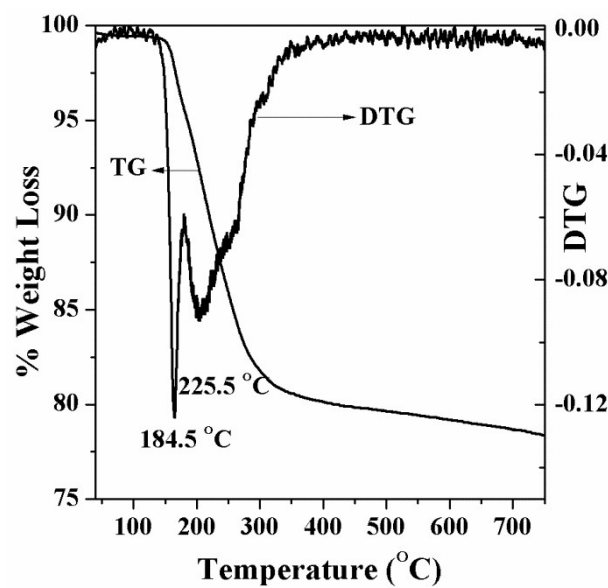

**Fig. S1**

**Fig. S1** The TG and DTG traces of the scratched films with post synthetic water vapour hydrothermal treatment.

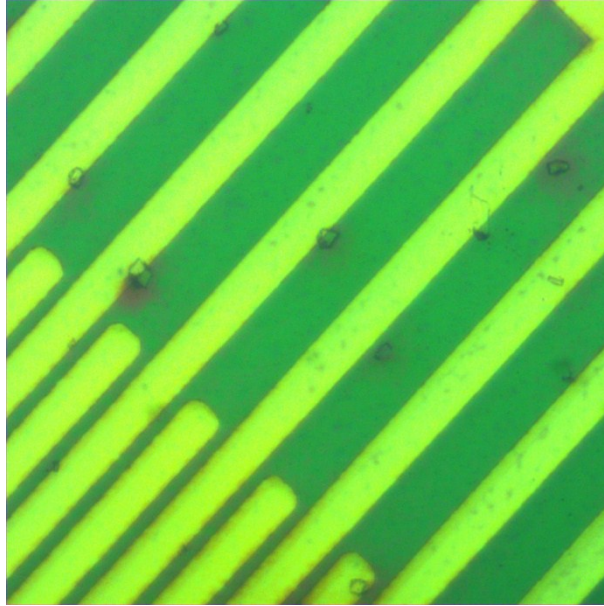

**Fig. S2**

**Fig. S2** Microscope image of the interdigital sensor devices with ordered nanoporous Pt doped SnO<sub>2</sub> thin film.

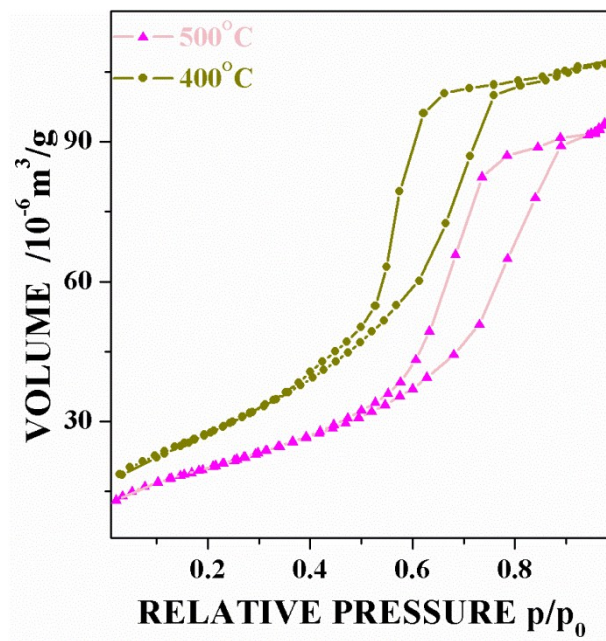

**Fig. S3**

**Fig. S3** N<sub>2</sub> adsorption/desorption isotherms for nanoporous Pt-SnO<sub>2</sub> thin films after 400°C and 500°C anneal.
